# Supplementary material for: Biomass Derived N-Doped Porous Carbon Made from Reed Straw for an Enhanced Supercapacitor
Source: MDPI journal article supplement (doi:10.3390/molecules28124633), 2023-06-08
Supplement: s1 [file s1]

## Supplementary Material

# Biomass Derived N-Doped Porous Carbon Made from Reed Straw for an Enhanced Supercapacitor

Yuyi Liao, Zhongtao Shang, Guangrui Ju, Dingke Wang, Qiao Yang, Yuan Wang \*  
and Shaojun Yuan \*

Low-Carbon Technology & Chemical Reaction Engineering Lab, College of  
Chemical Engineering, Sichuan University, Chengdu 610065, China;  
yimilyymail@163.com (Y.L.); taozi11281125@163.com (Z.S.);  
jugr0013@163.com (G.J.); dingkew0506@163.com (D.W.);  
yangqiaomail@163.com (Q.Y.)

\* Correspondence: wangyuan2022@scu.edu.cn (Y.W.); ysj@scu.edu.cn (S.Y.)

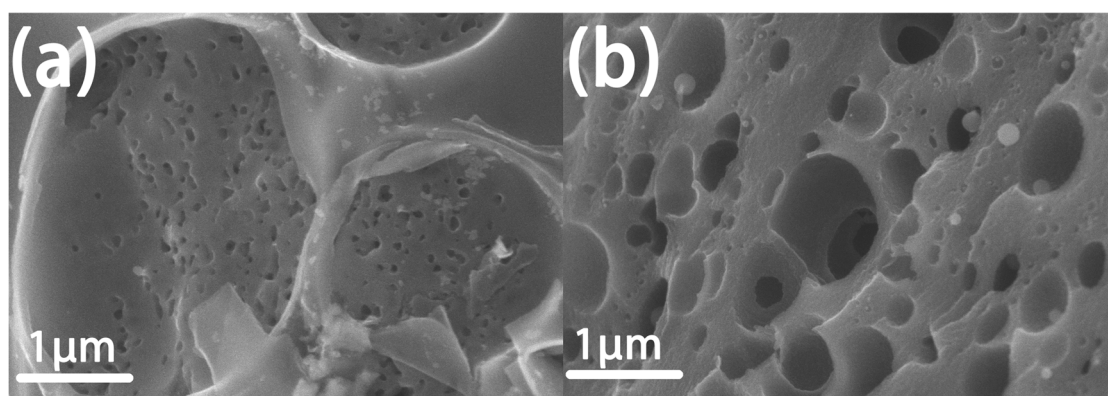

**Figure S1.** SEM images of (a) RSM-0.33-550 and (b) RSM-1-550.

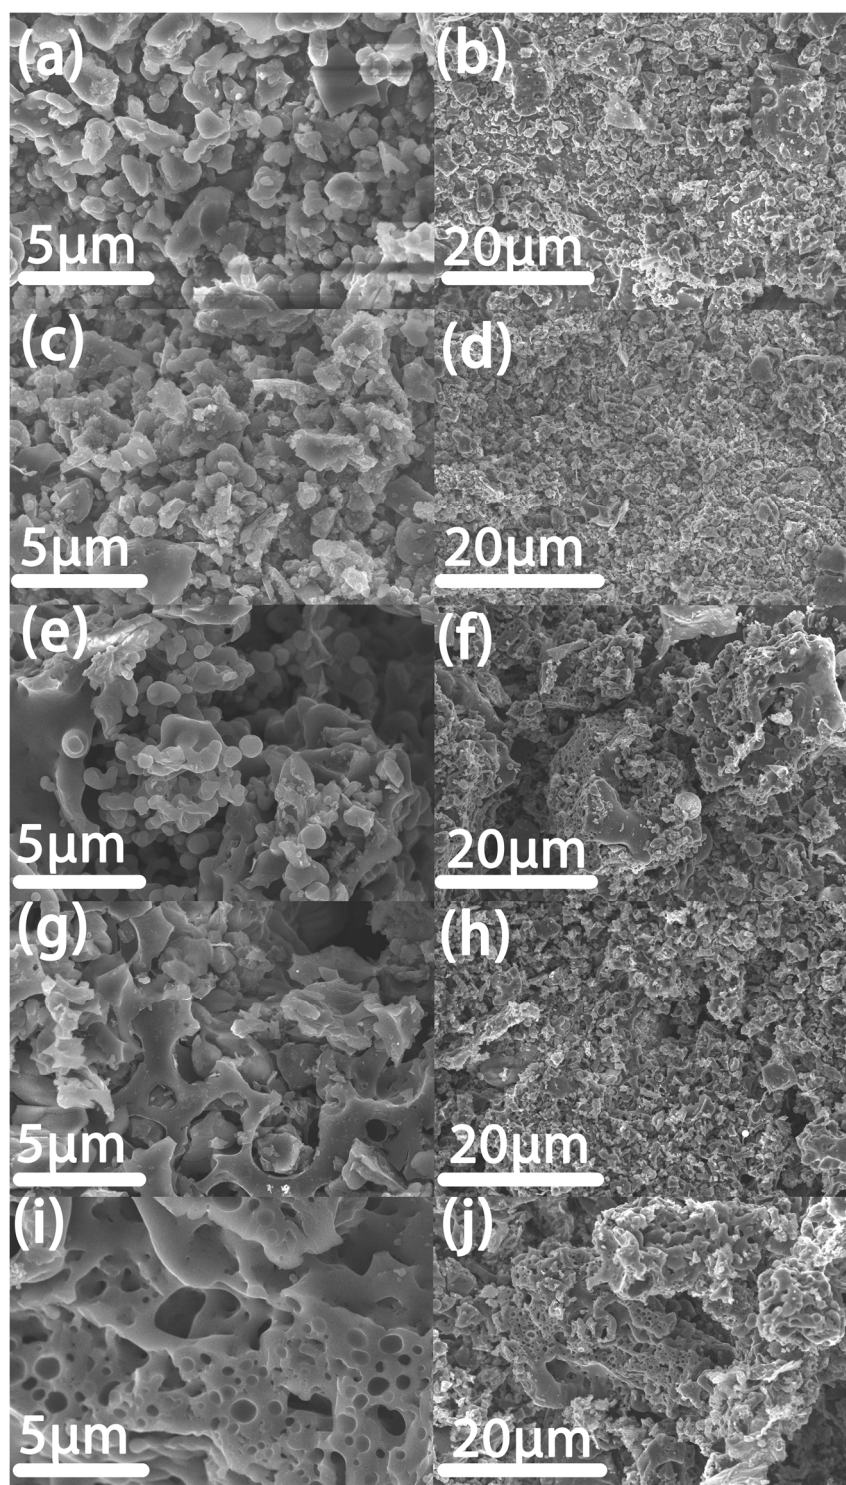

**Figure S2.** SEM images of (a,b) RSM-1-400, (c,d) RSM-1-500, (e,f) RSM-1-550, (g,h) RSM-1-600, and (i,j) RSM-1-650.

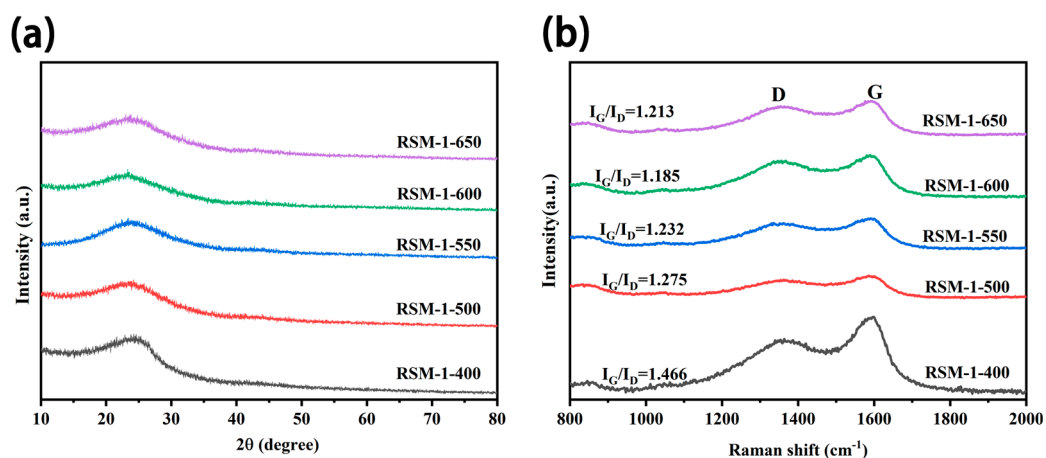

**Figure S3.** (a) XRD patterns of RSM-1-x ( $x = 400, 500, 550, 600$ , and  $650$ ), (b) Raman spectra of RSM-1-x ( $x = 400, 500, 550, 600$ , and  $650$ ).

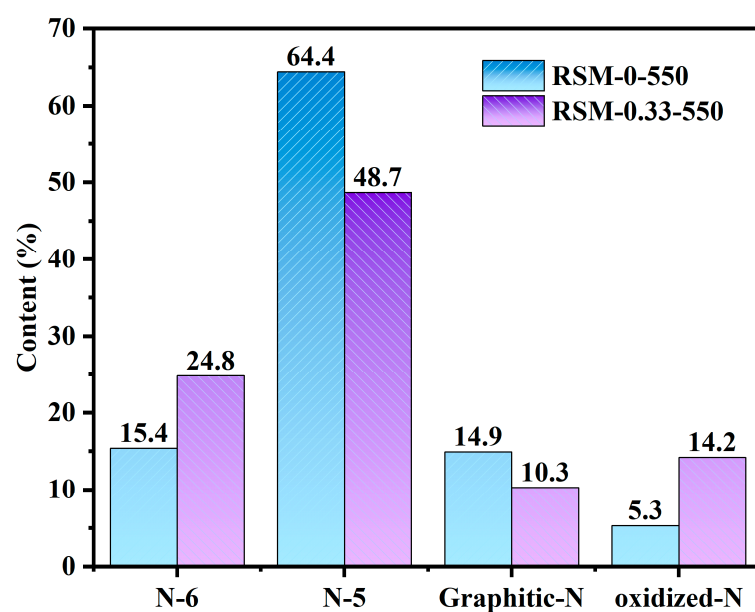

**Figure S4.** The content of different N species in RSM-0-550 and RSM-0.33-550.

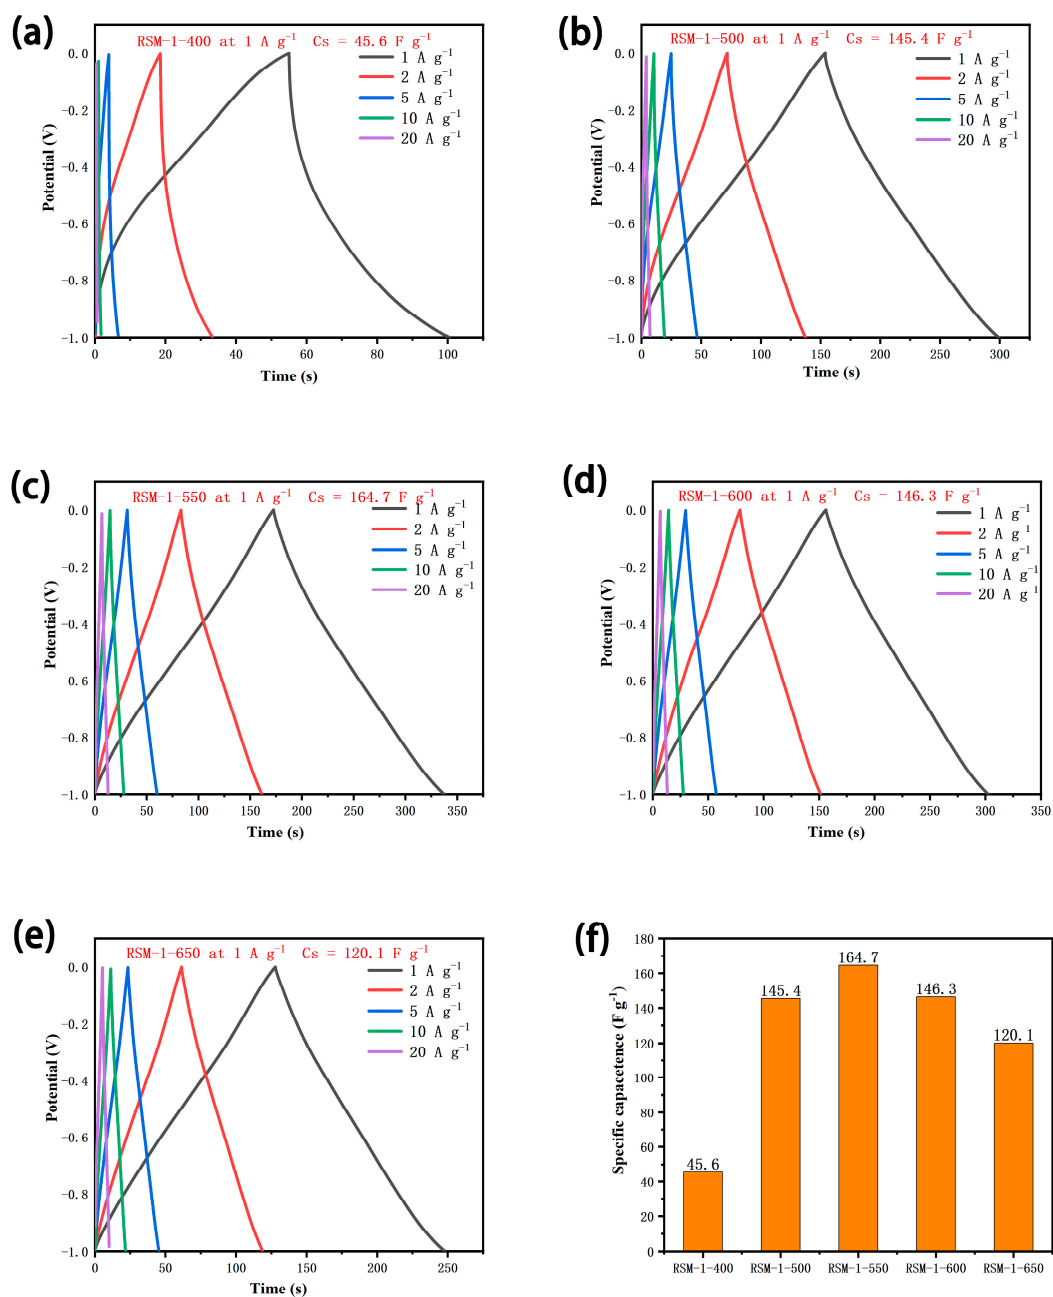

**Figure S5.** GCD curves of (a) RMS-1-400, (b) RMS-1-500, (c) RMS-1-550, (d) RMS-1-600, and (e) RMS-1-650 electrodes at the current densities of 1, 2, 4, 5, and 10 A g<sup>-1</sup>, respectively. (f) The specific capacitance of RSM-1-X (X = 400, 500, 550, 600, and 650) at a current density of 1 A g<sup>-1</sup>.

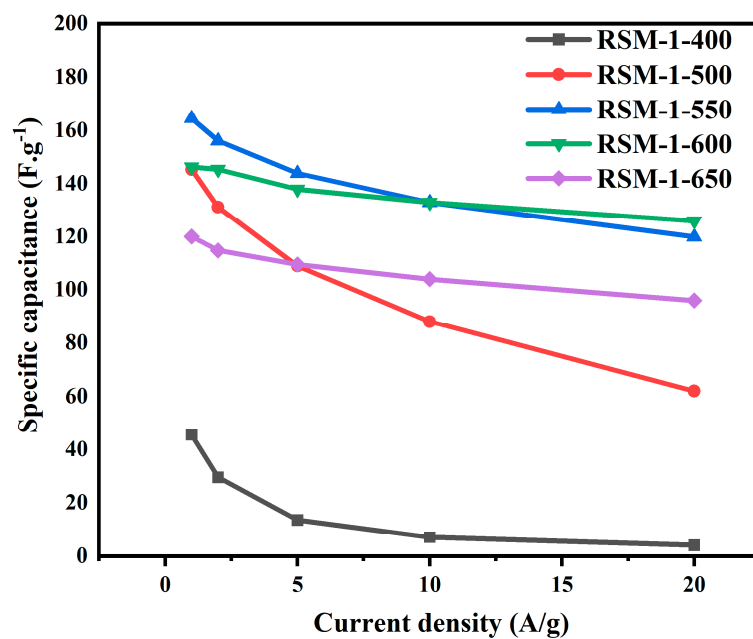

**Figure S6.** Rate performance of RSM-1-x (x = 400, 500, 550, 600, and 650) electrodes.

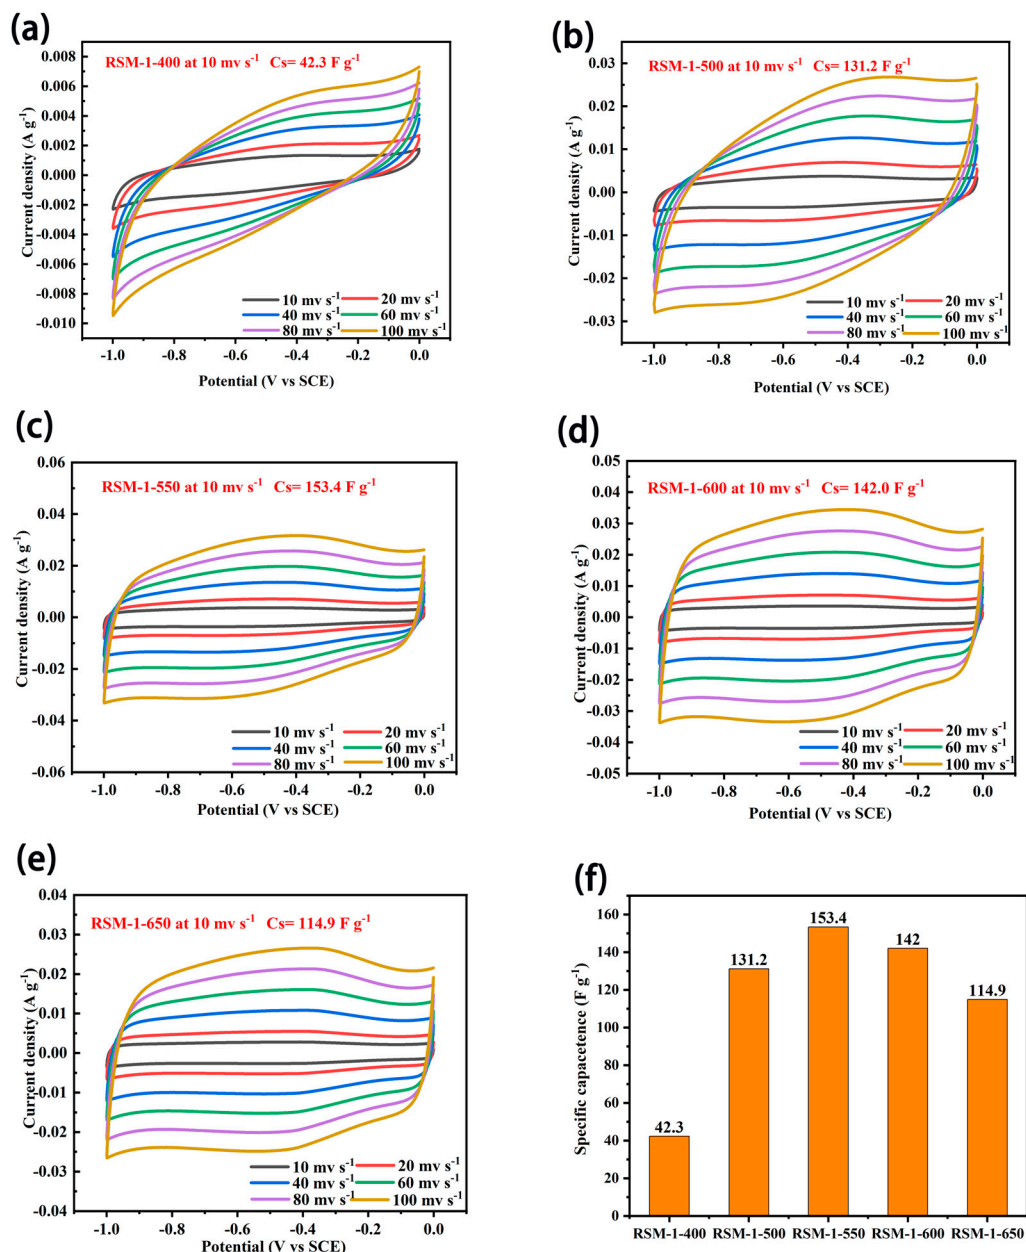

**Figure S7.** CV curves of (a) RSM-1-400, (b) RSM-1-500, (c) RSM-1-550, (d) RSM-1-600, and (e) RSM-1-650 electrodes at a scan rate of 10–100 mV s<sup>-1</sup>. (f) The specific capacitance values of RSM-1-X (X = 400, 500, 550, 600, and 650) at a scan rate of 10 mV s<sup>-1</sup>.

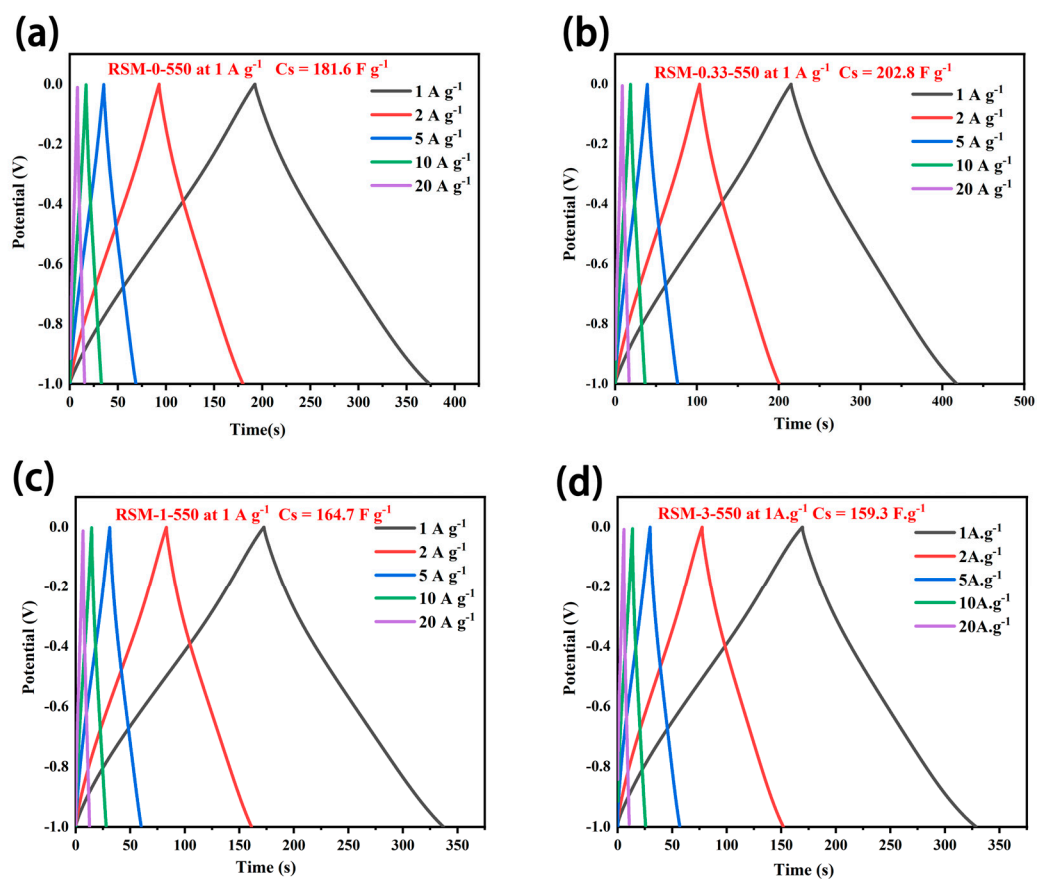

**Figure S8.** GCD curves of (a) RMS-0-550, (b) RMS-0.33-550, (c) RMS-1-550, and (d) RMS-3-550 electrodes at different current densities of 1, 2, 4, 5, and 10 A g<sup>-1</sup>.



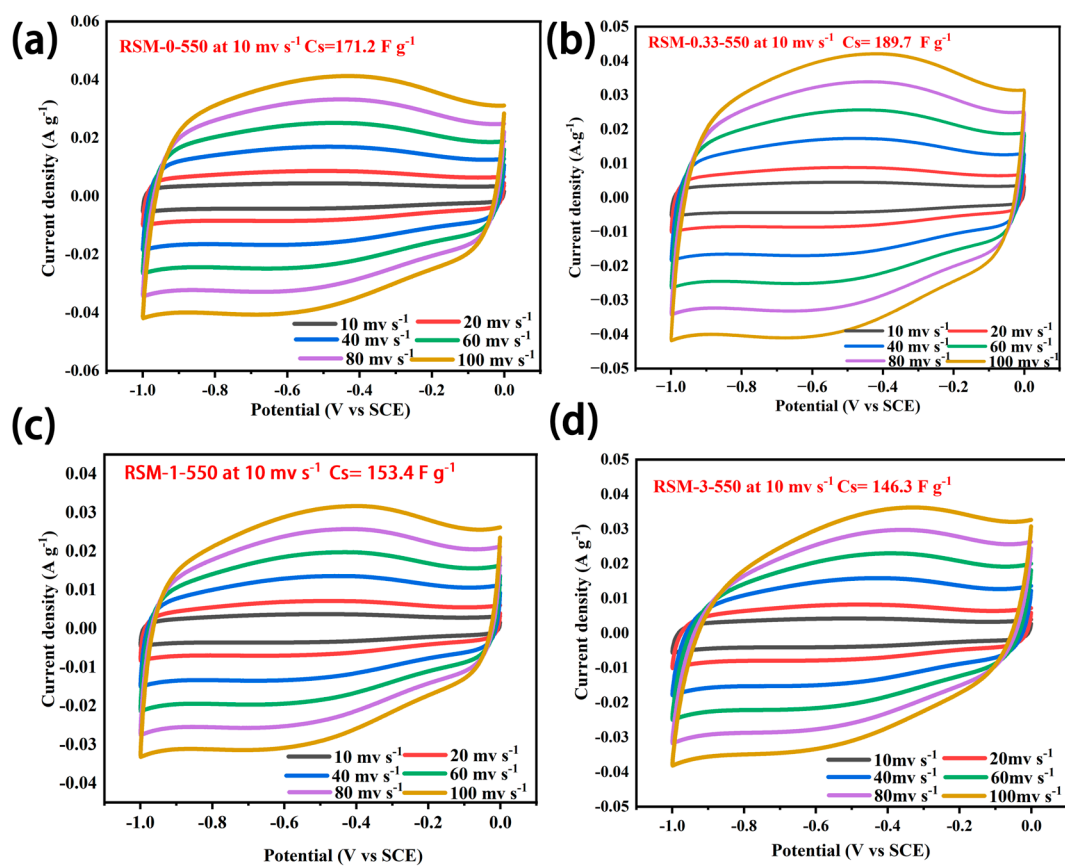

**Figure S9.** CV curves of (a) RMS-0-550, (b) RMS-0.33-550, (c) RMS-1-550, and (d) RMS-3-550 electrodes at a scan rate of 10–100  $\text{mV s}^{-1}$ .

**Table S1.** structural parameters of RSM-0.33-550.

| <b>Samples</b> | <b>Surface area <sup>a</sup></b><br><b>(m<sup>2</sup>g<sup>-1</sup>)</b> | <b>Pore volume <sup>b</sup></b><br><b>(cm<sup>3</sup>g<sup>-1</sup>)</b> | <b>Pore size <sup>c</sup></b><br><b>(nm)</b> |
|----------------|--------------------------------------------------------------------------|--------------------------------------------------------------------------|----------------------------------------------|
| RSM-0.33-550   | 547.1                                                                    | 0.159                                                                    | 9.2                                          |
| RSM-0-550      | 514.2                                                                    | 0.141                                                                    | 10.0                                         |

<sup>a</sup> BET surface area.

<sup>b</sup> BJH adsorption cumulative volume of pores between 17.000 and 3,000.000 Å width.

<sup>c</sup> BJH adsorption average pore width (4V/A).

**Table S2.** Electrochemical performance of RSM-0.33-550 and reported carbonaceous materials electrode in supercapacitors.

| Electrode                             | Electrolyte                                                           | Specific capacitance<br>(F g <sup>-1</sup> ) | Ref.                                          |
|---------------------------------------|-----------------------------------------------------------------------|----------------------------------------------|-----------------------------------------------|
| <b>RMS-0.33-550</b>                   | <b>6 M KOH</b>                                                        | <b>202.8 (1 A g<sup>-1</sup>)</b>            | <b>This work</b>                              |
| APG-1%                                | 6 M KOH                                                               | 158.5 (1 A g <sup>-1</sup> )                 | Journal of Power Sources, 2020, 472, 228610.  |
| Micro-, meso- and macroporous         | 1 M (C <sub>2</sub> H <sub>5</sub> ) <sub>4</sub> N(BF <sub>4</sub> ) | 157 (0.5 mA cm <sup>-2</sup> )               | Sci. Rep. 2016, 6, 21182.                     |
| Exfoliated carbon nanotubes           | 3 M NaOH                                                              | 154.4 (1 A g <sup>-1</sup> )                 | J. Power Sources 2011, 196, 5209–5214.        |
| P doping Graphene                     | 6 M KOH                                                               | 115 (0.05 A g <sup>-1</sup> )                | Chem. –Eur. J. 2015, 21, 80–85.               |
| B, N doping Graphene                  | 1 M H <sub>2</sub> SO <sub>4</sub>                                    | 29.7 (0.1 A g <sup>-1</sup> )                | J. Mater. Chem. A 2014, 2, 9532–9540.         |
| mesopores carbon                      | 1 M H <sub>2</sub> SO <sub>4</sub>                                    | 118 (5 mV s <sup>-1</sup> )                  | Chem. Int. Ed. 2017, 56, 5454–5459.           |
| multi wall carbon nanotube            | 6 M KOH                                                               | 179 (0.5 A g <sup>-1</sup> )                 | J. Renew. Sustain. Ener. 2016, 8, 014101.     |
| N-functionalized graphene             | 6 M KOH                                                               | 100 (0.1 V s <sup>-1</sup> )                 | ACS Appl. Mater. Interfaces 2017, 9, 710–721. |
| N-containing graphene                 | 0.1 M KOH                                                             | 50 (0.7 A g <sup>-1</sup> )                  | Appl. Mat. Today 2017, 9, 204–211.            |
| boron-doped graphene                  | 6 M KOH                                                               | 50 (0.1 A g <sup>-1</sup> )                  | ChemSusChem 2014, 7, 1102–1106.               |
| Hierarchical porous carbon            | 0.5M H <sub>2</sub> SO <sub>4</sub>                                   | 115                                          | Electrochim. Acta 2013, 113, 481–489.         |
| Core-shell composite/MnO <sub>2</sub> | 1 M Na <sub>2</sub> SO <sub>4</sub>                                   | 101 (0.05 A g <sup>-1</sup> )                | RSC Adv. 2016, 6, 64811–64817.                |
| Few layered graphene                  | Aq. H <sub>2</sub> SO <sub>4</sub>                                    | 151                                          | Arab. J. Chem. 2017, 10, 556–565.             |
| N, O, and P decorated carbon          | 6 M KOH                                                               | 206                                          | Electrochim. Acta 2015, 176 982–988.          |

---

|                  |                                       |                               |                                                 |
|------------------|---------------------------------------|-------------------------------|-------------------------------------------------|
| Activated carbon | 1.5 M Na <sub>2</sub> SO <sub>4</sub> | 82.5 (50 mV s <sup>-1</sup> ) | J. New Mater. Electron.<br>Syst. 2015, 18, 1–9. |
|------------------|---------------------------------------|-------------------------------|-------------------------------------------------|

---
